# Supplementary material for: Theoretical probing of monolayer BiI3 as an electrolyte separator and 3d-TM-doped BiI3 as electrocatalysts toward high-performance lithium–sulfur batteries
Source: Royal Society of Chemistry journal article supplement (doi:10.1039/d4ta02572e), 2024-01-01
Supplement: d4ta02572e1.pdf [file d4ta02572e1.pdf]

## Electronic Supplementary Information

# Theoretical probing monolayer $\text{BiI}_3$ as electrolyte separator and $3d$ -TM doped $\text{BiI}_3$ as electrocatalysts toward high performance Lithium-Sulfur batteries

Wentao Wu<sup>a</sup>, Kaixin Zou<sup>a</sup>, Li Wang<sup>a,b</sup>, Boyan Li<sup>\*,c</sup>, Wen Yang<sup>d</sup>, Chunlai Gao<sup>e</sup>, Feng Lu<sup>\*,a</sup>,  
Weichao Wang<sup>a</sup>, Wei-Hua Wang<sup>\*,a</sup>

<sup>a</sup>Department of Electronic Science and Engineering, and Tianjin Key Laboratory of Efficient Utilization of Solar Energy, Nankai University, Tianjin 300350, China

<sup>b</sup>Nanoyang Group, State Key Laboratory of Chemical Engineering, School of Chemical Engineering and Technology, Tianjin University, Tianjin, 300072, China

<sup>c</sup>National Institute of Clean-and-Low-Carbon Energy and Beijing Engineering Research Center of Nano-structured Thin Film Solar Cells, Beijing 102211, China

<sup>d</sup>Shanxi Key Laboratory of Metal Forming Theory and Technology, School of Material Science and Engineering, Taiyuan University of Science and Technology, Taiyuan 030024, China

<sup>e</sup>Faculty of Mathematics and Physics, Huaiyin Institute of Technology, Huaian 223001, China

\*Email: [whwangnk@nankai.edu.cn](mailto:whwangnk@nankai.edu.cn), [boyan.li.a@chnenergy.com.cn](mailto:boyan.li.a@chnenergy.com.cn), [lufeng@nankai.edu.cn](mailto:lufeng@nankai.edu.cn)

### Details of formation energy of the substitutional doping configuration ( $\text{TM}_{\text{sub}}/\text{BiI}_3$ )

The formation energy of substitutional doping for  $\text{TM}_{\text{sub}}/\text{BiI}_3$  is expressed as,

$$E_{\text{form}} = E_{\text{TM}_{\text{sub}}/\text{BiI}_3} + E_{\text{Bi}} - E_{\text{BiI}_3} - E_{\text{TM}}$$

where  $E_{\text{TM}_{\text{sub}}/\text{BiI}_3}$ ,  $E_{\text{BiI}_3}$ ,  $E_{\text{TM}}$  and  $E_{\text{Bi}}$  are the energies of the substitutional doping systems, the monolayer  $\text{BiI}_3$  supercell, one single TM and Bi atom, respectively.

### Details of equilibrium potential ( $U_{\text{eq}}$ ) of Sulfur reduction reaction

The computational details are analogous to the oxygen reduction reaction and oxygen evolution reaction processes. Firstly, the standard free energy of  $\text{Li}_2\text{S}$  formation is defined by the following formula,

$$\Delta G_{\text{f}}^0 = 8G(\text{Li}_2\text{S}_{\text{bulk}})^0 - G(\text{S}_8 - \text{bulk})^0 - 16G(\text{Li}_{\text{atom}})^0$$

where  $G(\text{Li}_2\text{S}_{\text{bulk}})^0$ ,  $G(\text{S}_8 - \text{bulk})^0$ ,  $G(\text{Li}_{\text{atom}})^0$  represent the total energies of bulk  $\text{Li}_2\text{S}$ , one  $\text{S}_8$  cluster, and one Li atom in bulk phase. Here, the Gibbs energy of  $\text{Li}_2\text{S}$ ,  $\text{S}_8$  are -32.918 eV, -11.995 eV, respectively. Therefore, the standard free energy of  $\text{Li}_2\text{S}$  formation ( $\Delta G_{\text{f}}^0$ ) and equilibrium potential are calculated as follows,

$$\Delta G_{\text{f}}^0 = -32.546 \text{ eV}$$

$$U_{\text{eq}} = -\frac{\Delta G_{\text{f}}^0}{16e} = \frac{32.546 \text{ eV}}{16e} = 2.034 \text{ V}$$

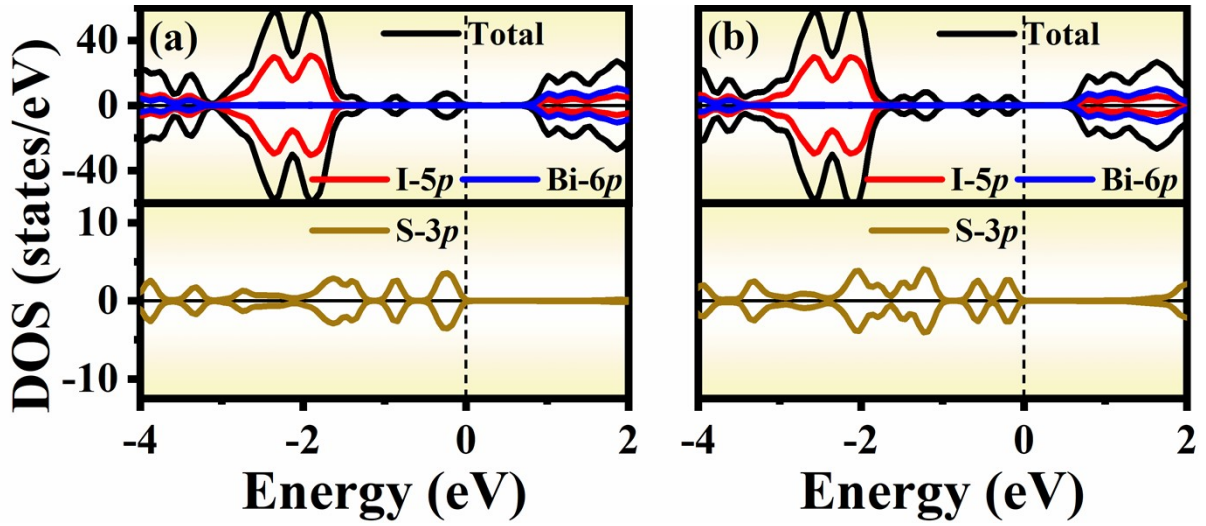

Fig. S1 Density of states for monolayer BiI<sub>3</sub> adsorbed with Li<sub>2</sub>S<sub>6</sub> in (a) and with Li<sub>2</sub>S<sub>8</sub> in (b).

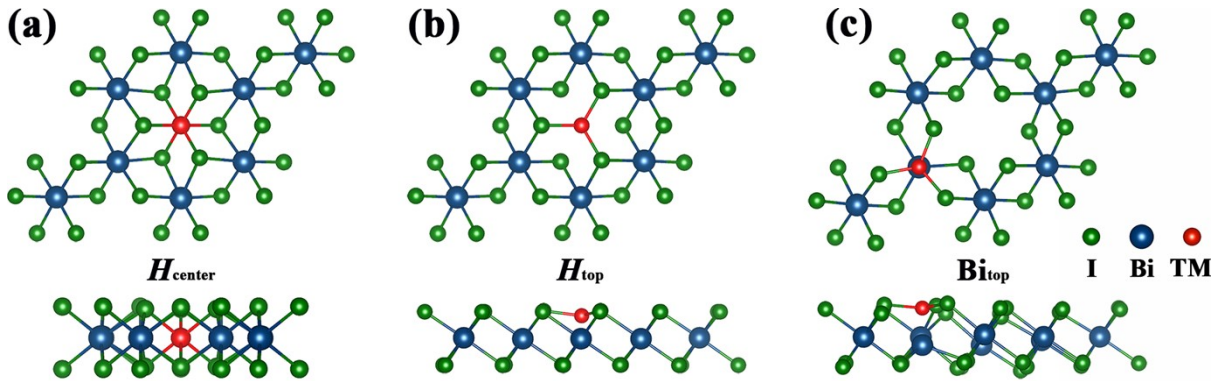

Fig. S2 The three stable adsorption doping configurations of 2D TM/BiI<sub>3</sub> with the  $H_{center}$  configuration for Ti, V, Cr, Mn/BiI<sub>3</sub> systems in (a),  $H_{top}$  configuration for Cu/BiI<sub>3</sub> system in (b),  $Bi_{top}$  configuration for Fe, Co, Ni/BiI<sub>3</sub> systems in (c).

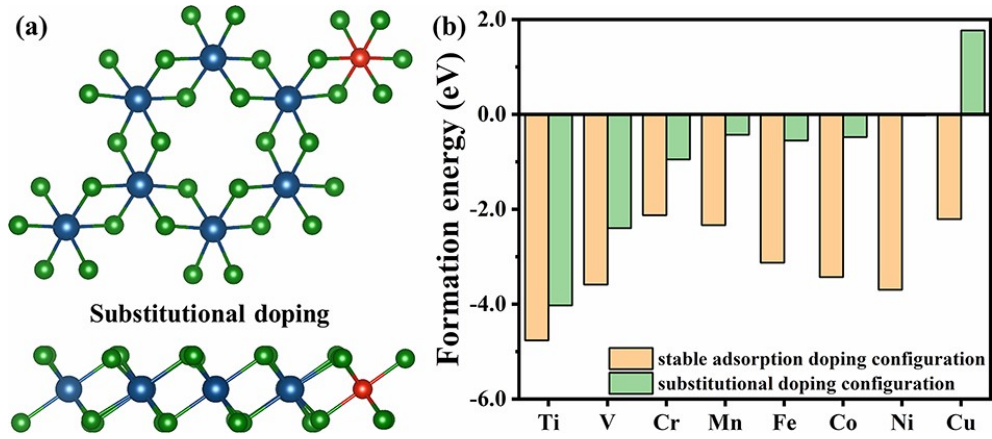

**Fig. S3** (a) Top view and side view of the substitutional doping  $\text{TM}_{\text{sub}}/\text{BiI}_3$  systems, and formation energies of the most stable adsorption doping  $\text{TM}/\text{BiI}_3$  systems and the substitutional doping  $\text{TM}_{\text{sub}}/\text{BiI}_3$  systems in (b).

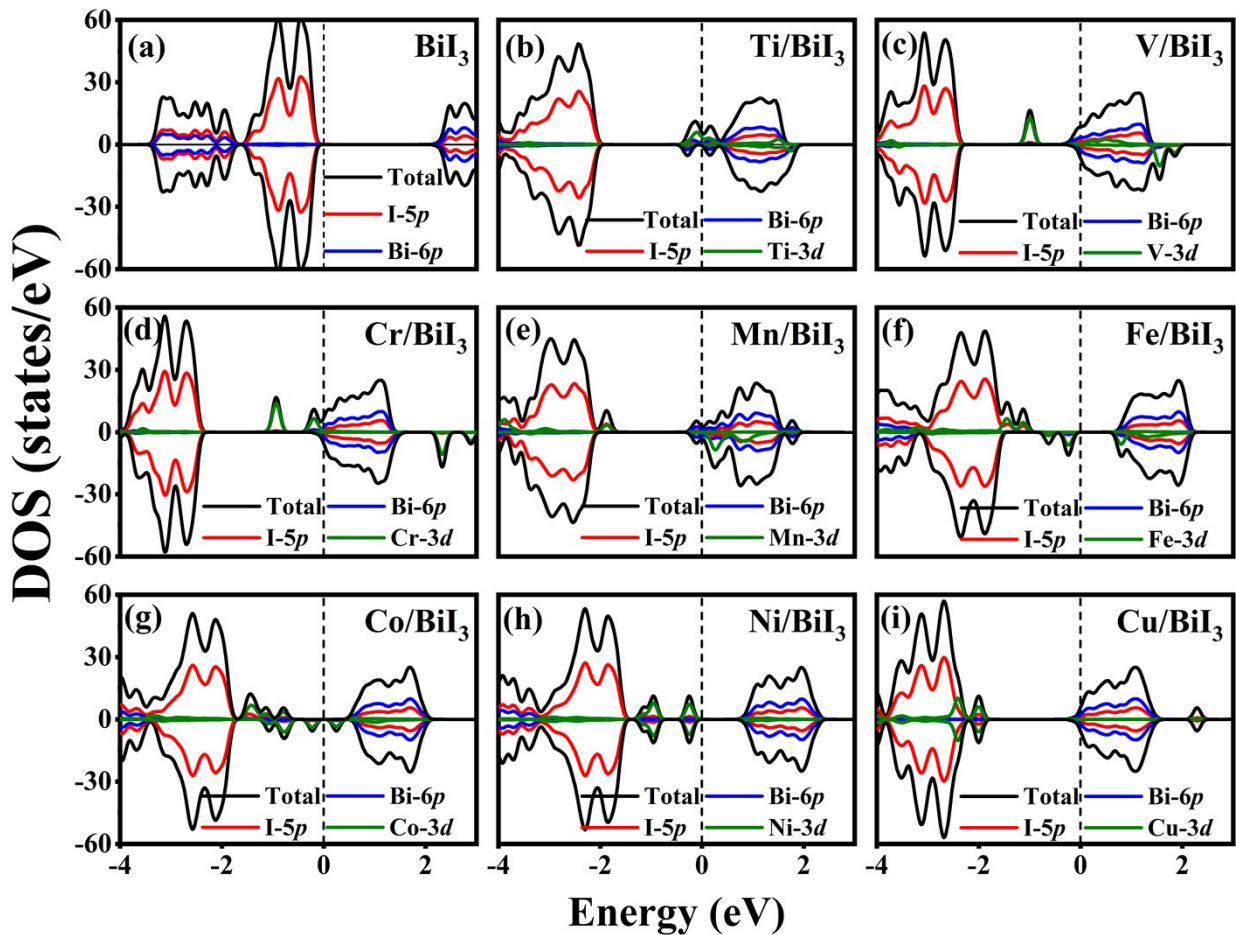

**Fig. S4** Density of states for (a) pristine  $\text{BiI}_3$  and (b-i) 3d-TM/ $\text{BiI}_3$  systems. (b)  $\text{Ti}/\text{BiI}_3$ , (c)  $\text{V}/\text{BiI}_3$ , (d)  $\text{Cr}/\text{BiI}_3$ , (e)  $\text{Mn}/\text{BiI}_3$ , (f)  $\text{Fe}/\text{BiI}_3$ , (g)  $\text{Co}/\text{BiI}_3$ , (h)  $\text{Ni}/\text{BiI}_3$ , (i)  $\text{Cu}/\text{BiI}_3$ .

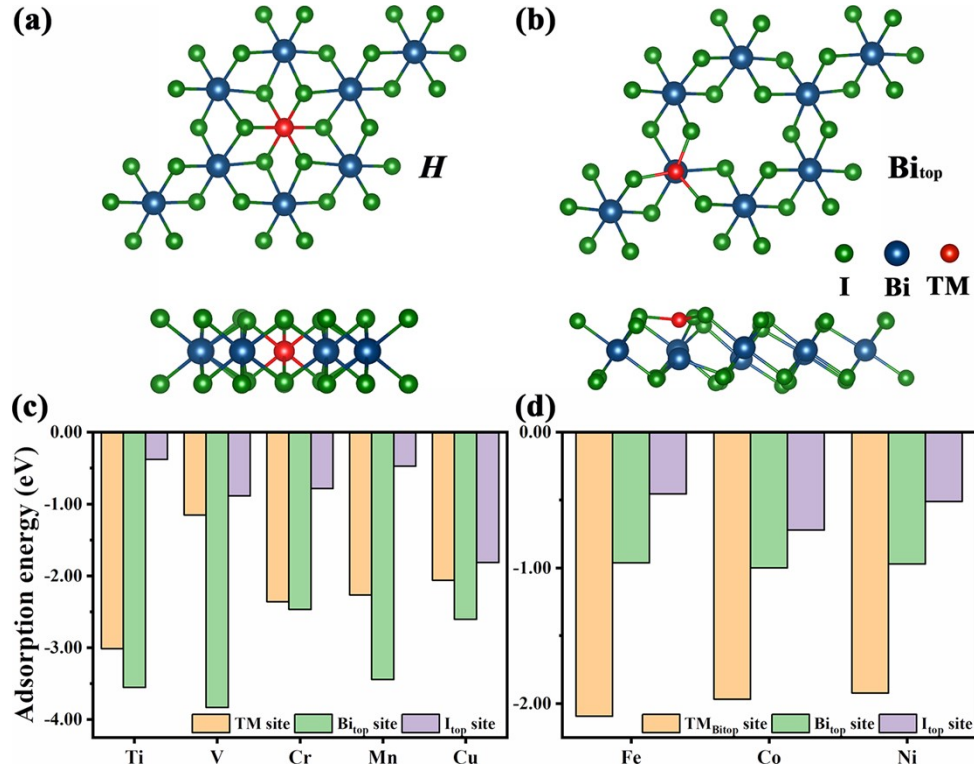

**Fig. S5** (a) Top view and side view of LiPSs adsorption sites on  $H$  doped site (Ti, V, Cr, Mn, Cu doped  $BiI_3$ ) (b) and  $Bi_{top}$  doped site (Fe, Co, Ni doped  $BiI_3$ ) configurations, respectively. Adsorption energies of  $Li_2S$  at different adsorption sites for  $H$  doped site configuration (Ti, V, Cr, Mn, Cu doped  $BiI_3$ ) in (c) and on  $Bi_{top}$  doped site configuration (Fe, Co, Ni doped  $BiI_3$ ) in (d).

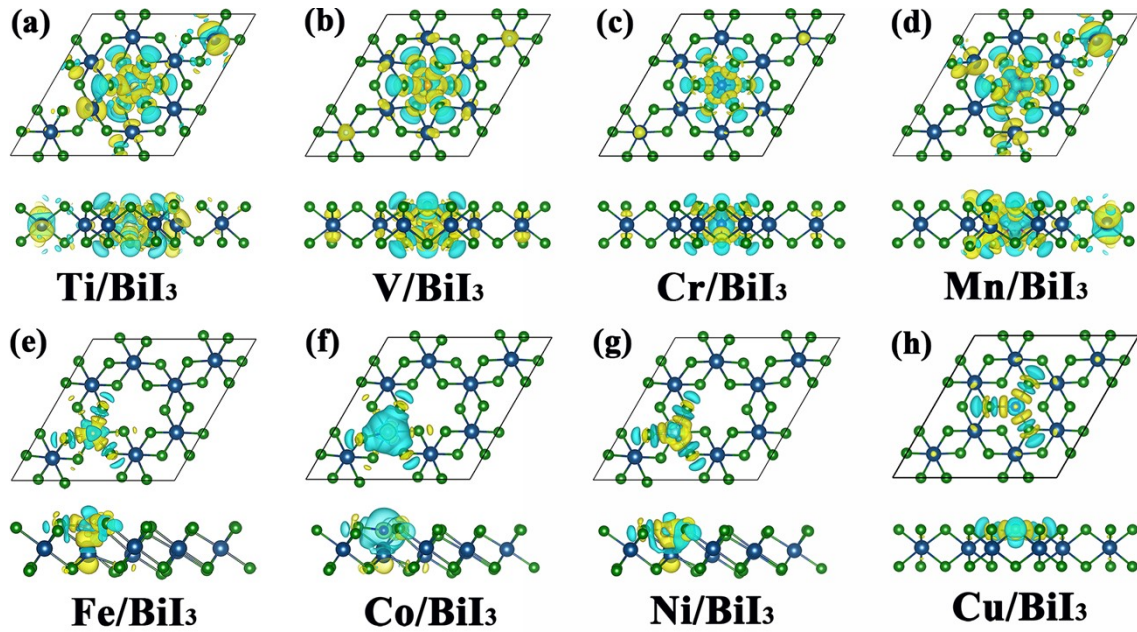

**Fig. S6** Charge density difference in top and side views for (a) Ti/ $BiI_3$ , (b) V/ $BiI_3$ , (c) Cr/ $BiI_3$ , (d) Mn/ $BiI_3$ , (e) Fe/ $BiI_3$ , (f) Co/ $BiI_3$ , (g) Ni/ $BiI_3$ , (h) Cu/ $BiI_3$  systems.



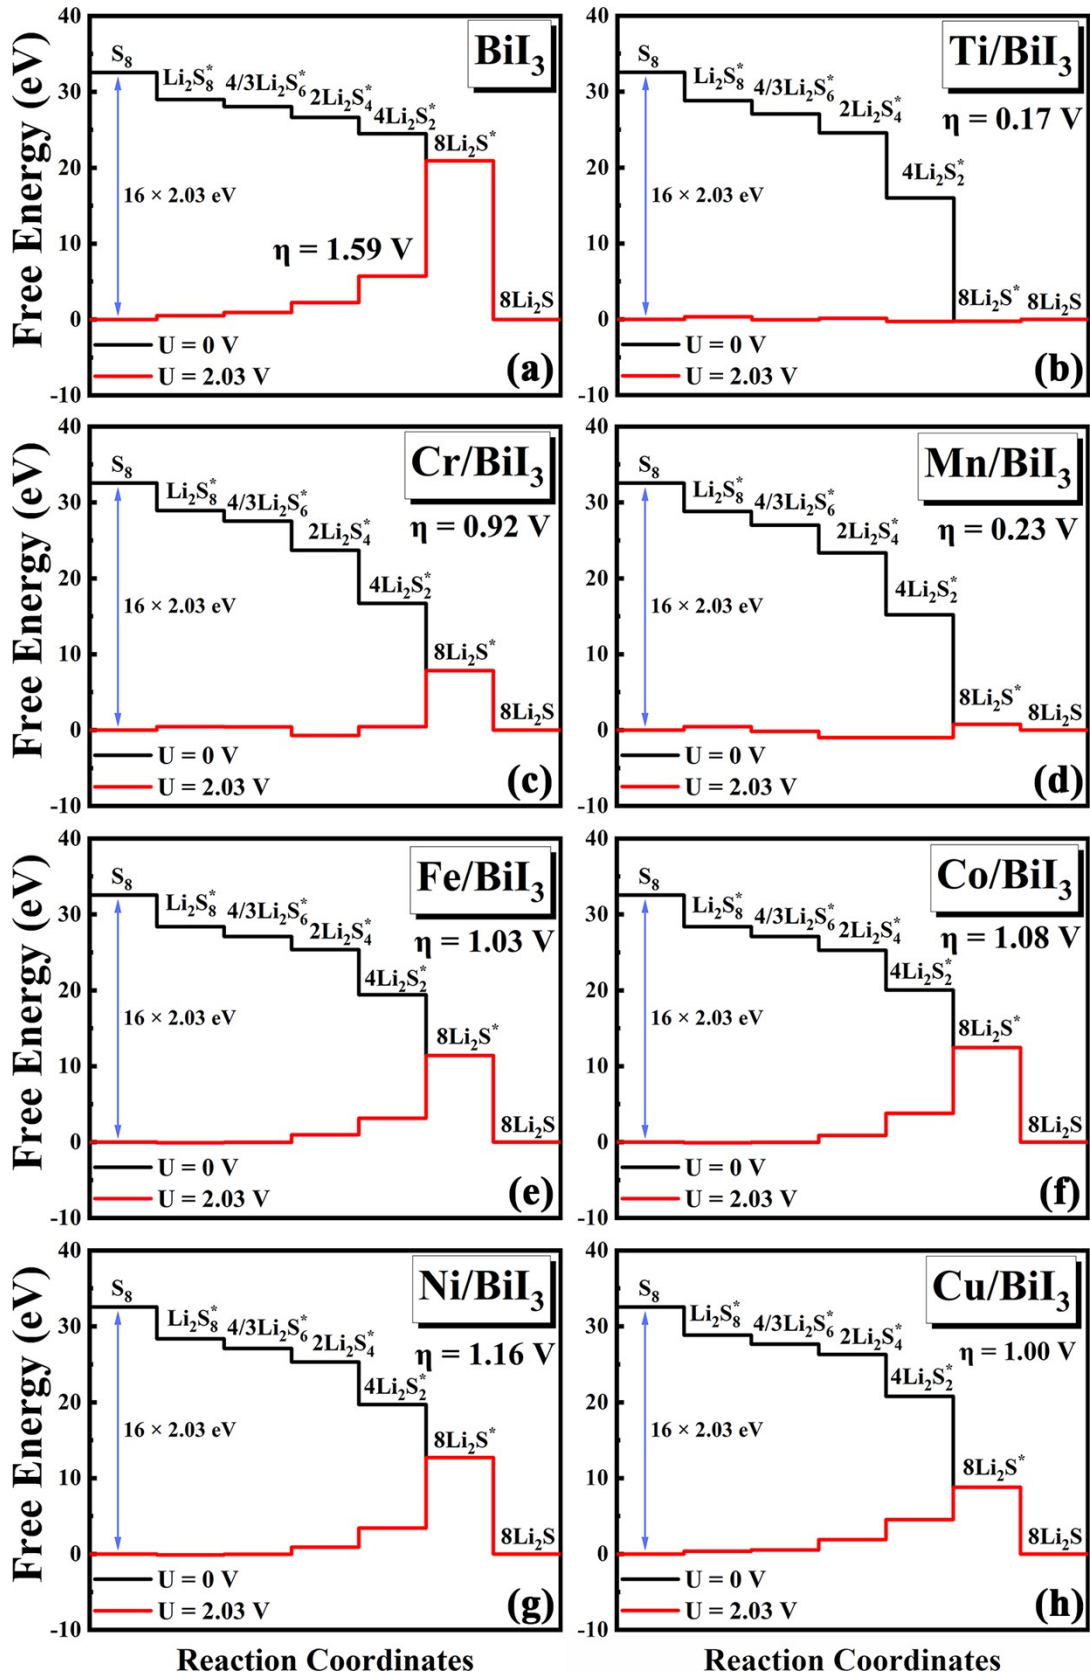

Fig. S7 Free energy of SRR for TM/Bi<sub>3</sub> systems at U = 0 V and equilibrium potential (U = 2.03V).

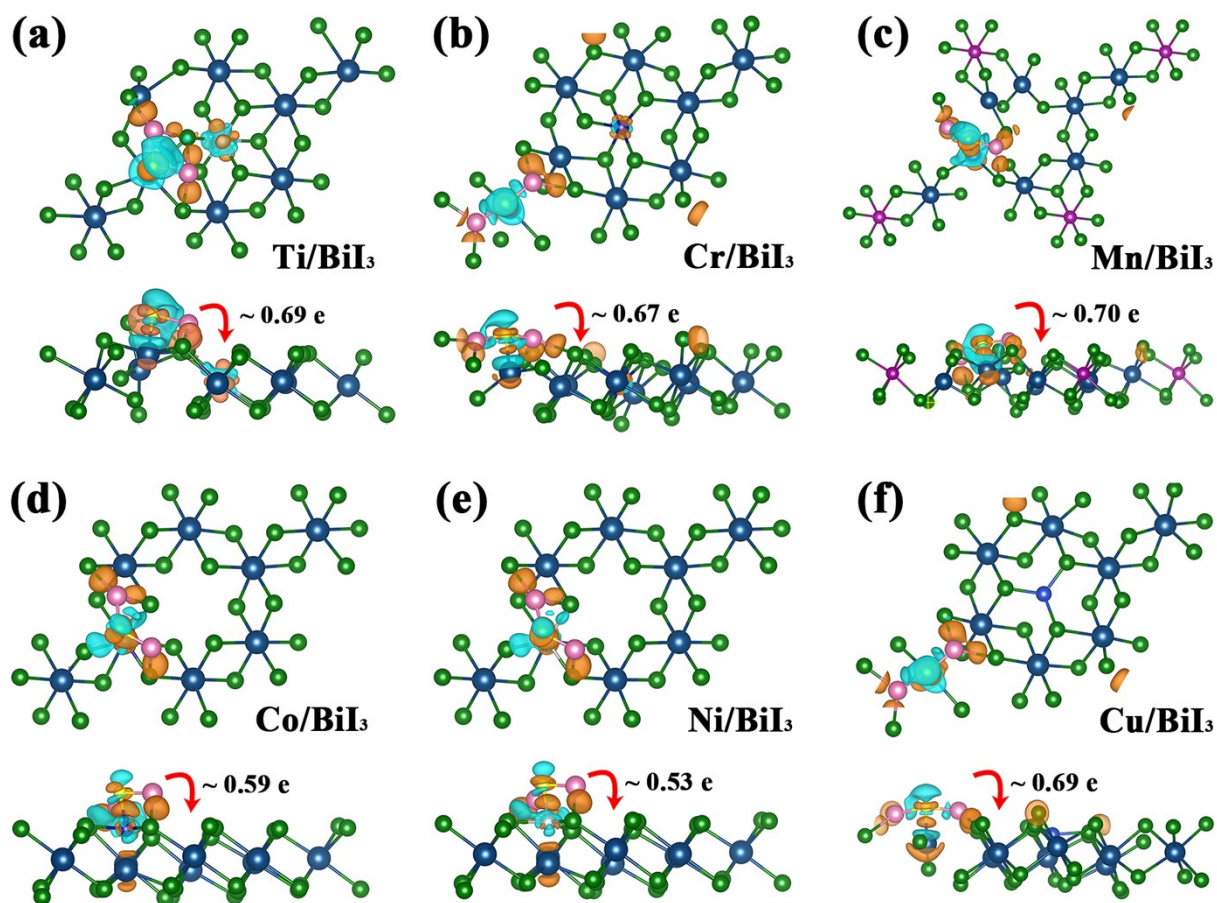

**Fig. S8** Charge density difference in top and side views for Li<sub>2</sub>S adsorbed on (a) Ti/BiI<sub>3</sub>, (b) Cr/BiI<sub>3</sub>, (c) Mn/BiI<sub>3</sub>, (d) Co/BiI<sub>3</sub>, (e) Ni/BiI<sub>3</sub>, (f) Cu/BiI<sub>3</sub> systems.

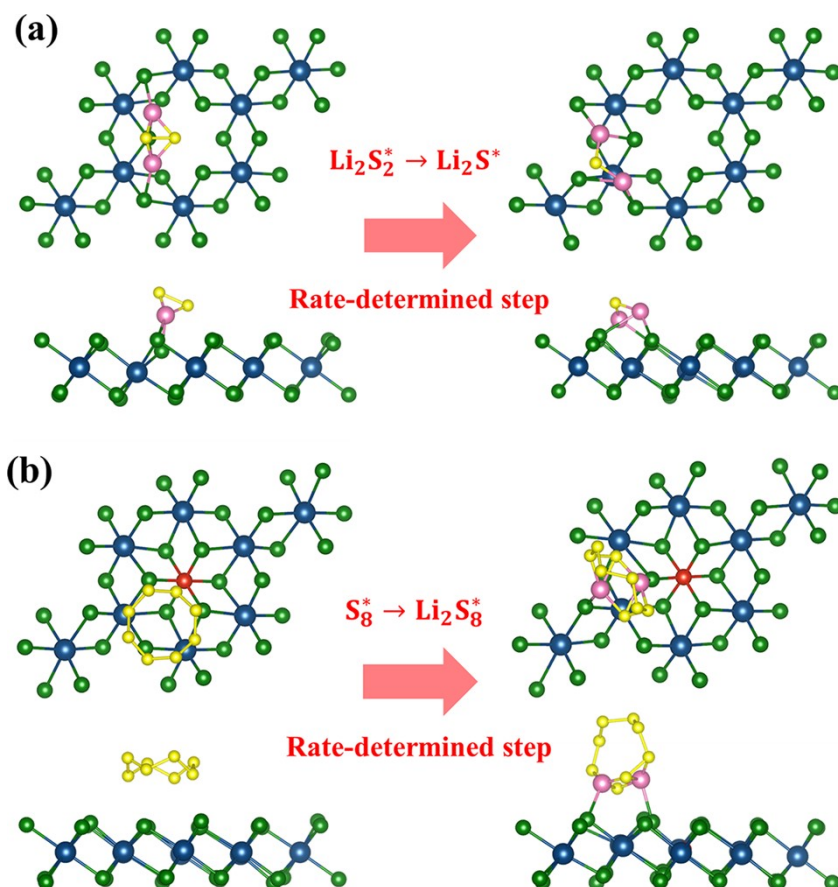

Fig. S9 The diagrams of rate-determined step on  $\text{BiI}_3$  (a) and  $\text{V/BiI}_3$  in (b).



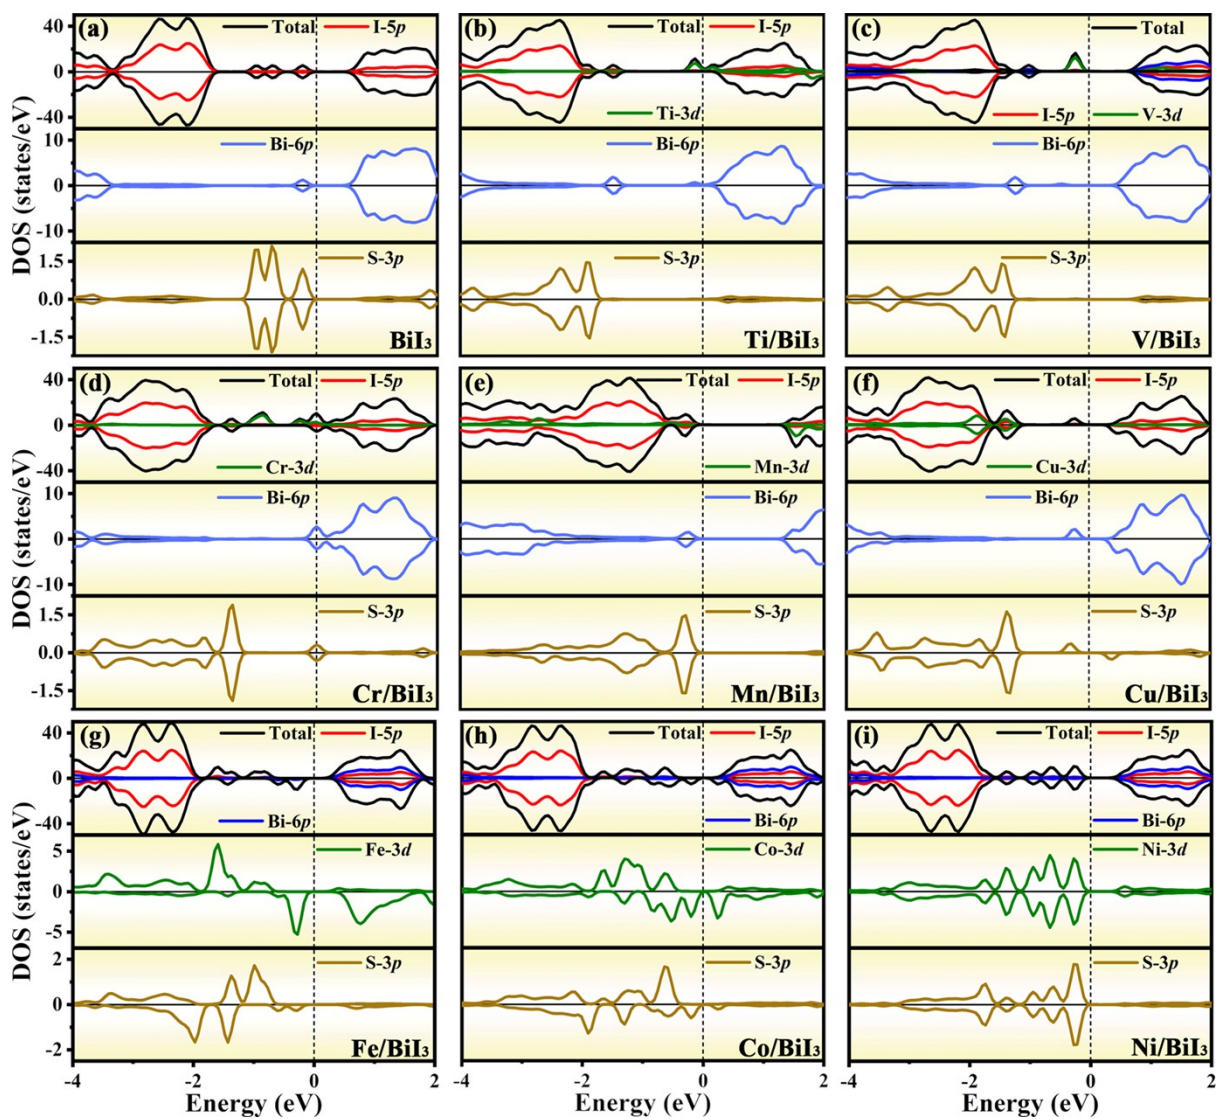

**Fig. S10** Density of states of  $\text{Li}_2\text{S}$  adsorbed on  $\text{BiI}_3$  in (a),  $\text{Ti/BiI}_3$  in (b),  $\text{V/BiI}_3$  in (c),  $\text{Cr/BiI}_3$  in (d),  $\text{Mn/BiI}_3$  in (e),  $\text{Cu/BiI}_3$  in (f),  $\text{Fe/BiI}_3$  in (g),  $\text{Co/BiI}_3$  in (h) and  $\text{Ni/BiI}_3$  in (i).

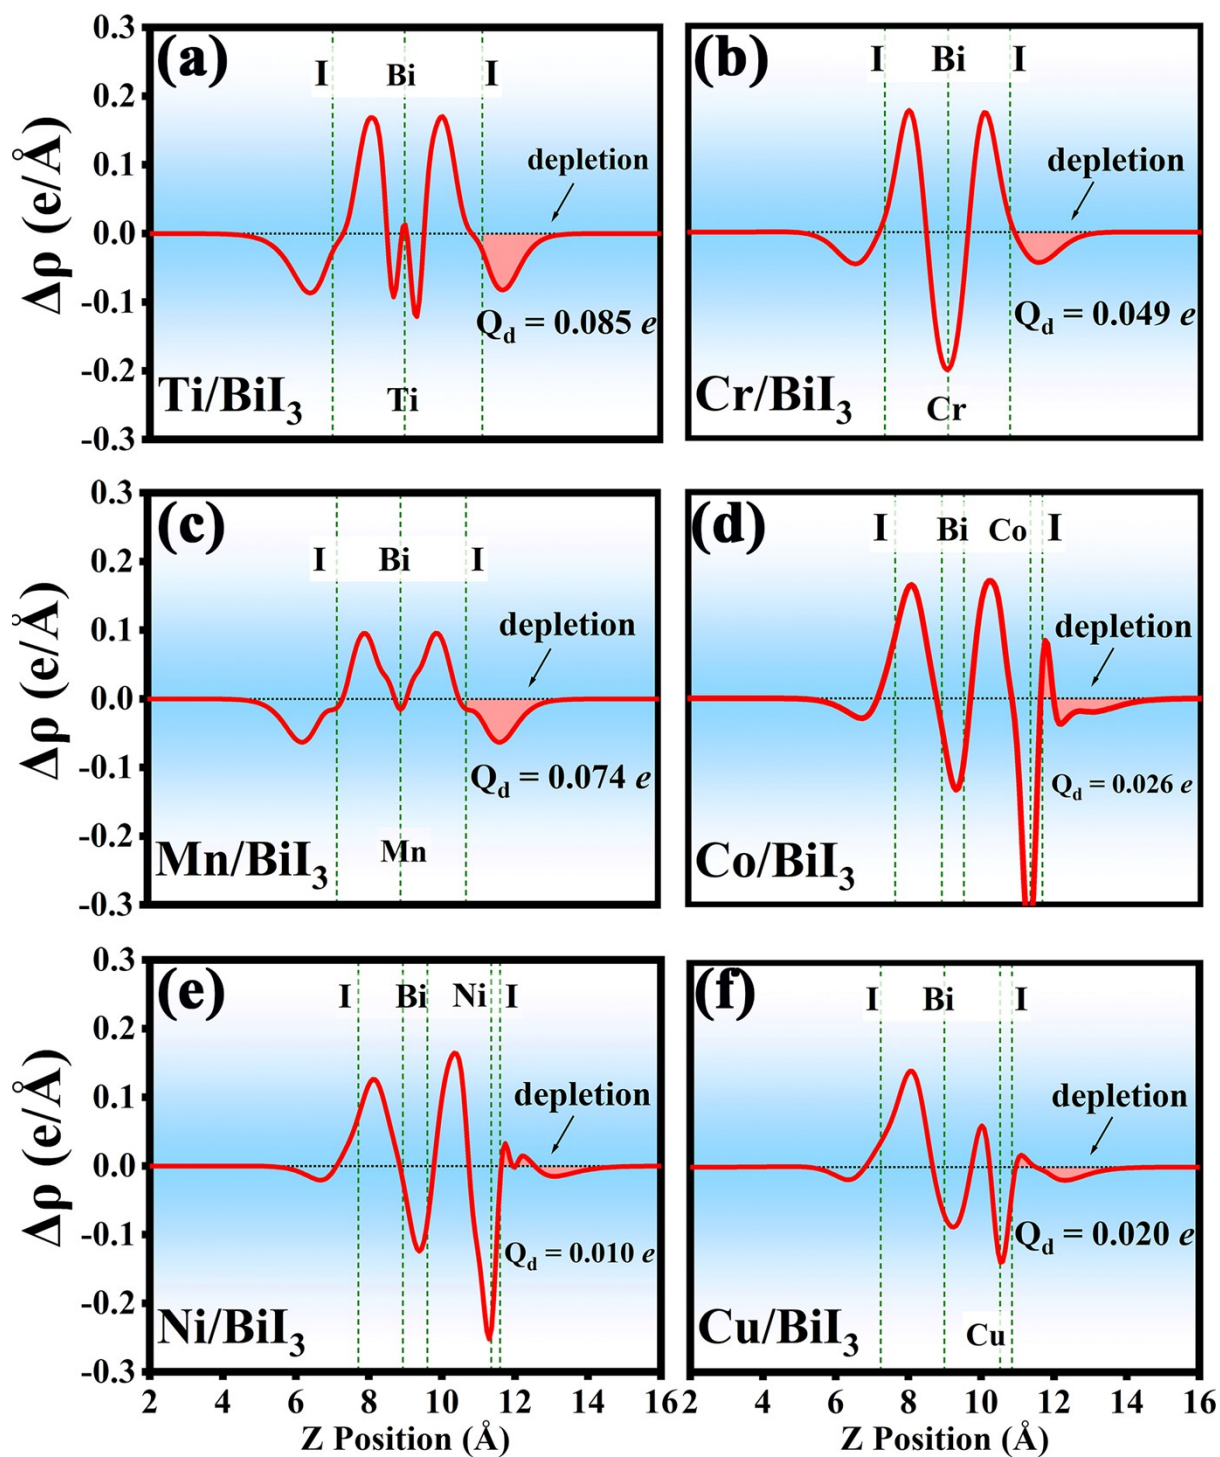

**Fig. S11** The xy plane-averaged charge density differences along the z axis for (a)  $\text{Ti}/\text{BiI}_3$ , (b)  $\text{Cr}/\text{BiI}_3$ , (c)  $\text{Mn}/\text{BiI}_3$ , (d)  $\text{Co}/\text{BiI}_3$ , (e)  $\text{Ni}/\text{BiI}_3$ , and (f)  $\text{Cu}/\text{BiI}_3$  systems.

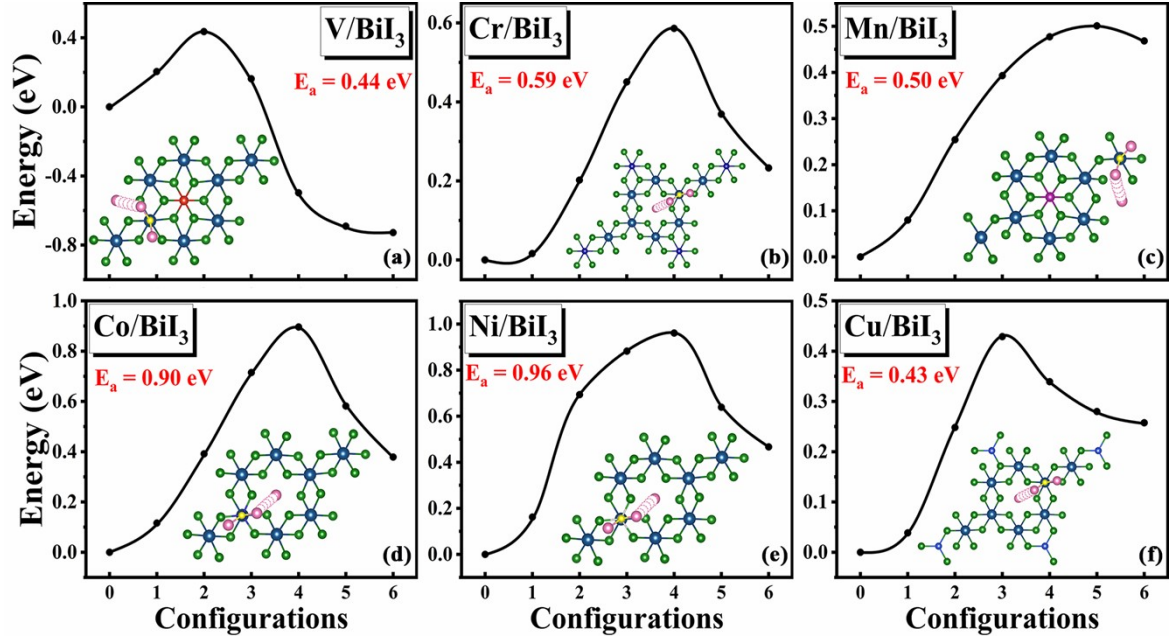

**Fig. S12**  $\text{Li}_2\text{S}$  decomposition barrier curves for (a)  $\text{V}/\text{BiI}_3$ , (b)  $\text{Cr}/\text{BiI}_3$ , (c)  $\text{Mn}/\text{BiI}_3$ , (d)  $\text{Co}/\text{BiI}_3$ , (e)  $\text{Ni}/\text{BiI}_3$ , (f)  $\text{Cu}/\text{BiI}_3$  systems.

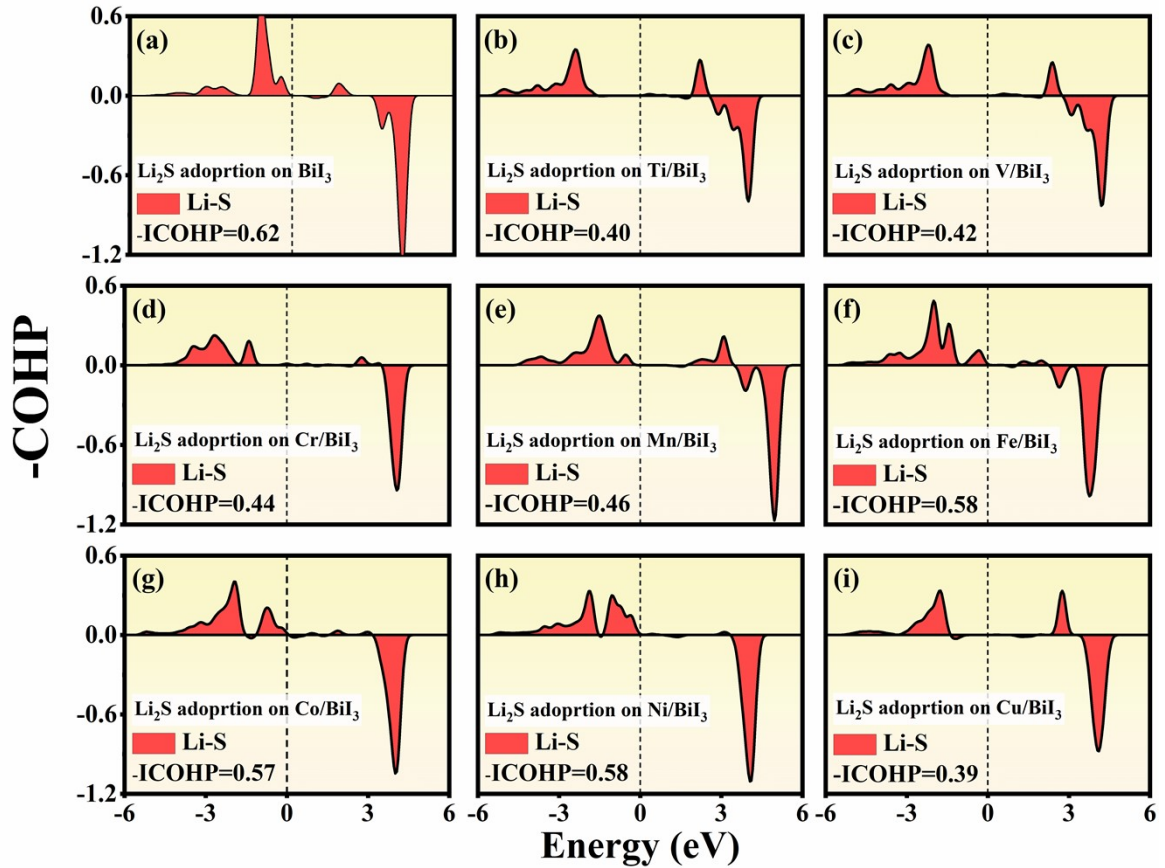

**Fig. S13** The COHP of Li-S bonds in  $\text{Li}_2\text{S}$  adsorbed on  $3d$ -TM doped  $\text{BiI}_3$  systems. (a)  $\text{BiI}_3$ , (b)  $\text{Ti}/\text{BiI}_3$ , (c)  $\text{V}/\text{BiI}_3$ , (d)  $\text{Cr}/\text{BiI}_3$ , (e)  $\text{Mn}/\text{BiI}_3$ , (f)  $\text{Fe}/\text{BiI}_3$ , (g)  $\text{Co}/\text{BiI}_3$ , (h)  $\text{Ni}/\text{BiI}_3$ , (i)  $\text{Cu}/\text{BiI}_3$ .
